# Supplementary material for: Industrial Optimization of Vacuum Disk Filter Dewatering in an Iron Ore Beneficiation Plant
Source: Research Square preprint supplement (doi:10.21203/rs.3.rs-8060071/v1), 2025-12-03
Supplement: Supplementary file 1 [file a5deb07797693c1858686ab6.docx]

**Vacuum Disk Filters**

**Iron Concentrate**

**Filtrate**

**Conditioning**

**Tank**

**Flocculant**

**Filter Cake**

**Flowsheet of concentrate filtration circuit at Sanabad iron beneficiation plant**

**Ceramic Vacuum Disk Filters**

**Filter Cake**

**Iron Concentrate**

**Input variables**

Feed Particle Size

Disk Rotation Speed

Filter Tanks Pulp Level

Tank Agitator Speed Flocculant Addition

Filter Wash Cycle Time Washing Acid Concentration

**Optimized variables**

Feed Particle Size: **39% <38 μm**

Disk Rotation Speed: **30 rpm**

Filter Tanks Pulp Level: **50%**

Tank Agitator Speed: **50 rpm**

Flocculant Addition: **10 g/t**

Filter Wash Cycle Time: **6 hours**

Routine Cleaning: **1% HNO₃, 45–60 min**

**Output variables**

Cake Moisture

Cake Thickness

Filtrate Turbidity
